# Supplementary material
Source: Springer Nature journal article supplement (https://www.springermedizin.de/resource/supplementary/12889_2012_5363_MOESM1_ESM.pdf/9495154)

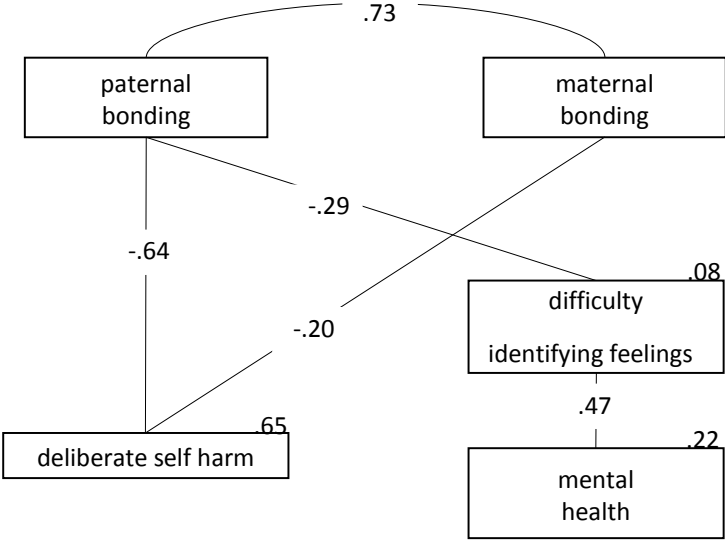

Chi-square= .546  
df=5  
p=.546  
CFI=1.000  
AGFI=.965  
RMSEA=.000

Supplement: MOESM1 [file 9495154]
